# Supplementary material for: Muscle-inspired MXene/PVA hydrogel with high toughness and photothermal therapy for promoting bacteria-infected wound healing
Source: Royal Society of Chemistry journal article supplement (doi:10.1039/d1bm01604k), 2021-12-21
Supplement: d1bm01604k1.pdf [file d1bm01604k1.pdf]

## Supporting Information

# **Muscle-inspired MXene/PVA hydrogel with high toughness and photothermal therapy for promoting bacteria-infected wound healing**

Yan Li<sup>a</sup>, Miaomiao Han<sup>a</sup>, Yue Cai<sup>a</sup>, Bing Jiang<sup>a</sup>, Yuanxin Zhang<sup>a</sup>, Biao Yuan<sup>a</sup>, Feng Zhou<sup>\*b</sup>, Chongjiang Cao<sup>\*a</sup>

<sup>a</sup> Department of Food Quality and Safety/National R&D Center for Chinese Herbal Medicine Processing, College of Engineering, China Pharmaceutical University, Nanjing 211198, China.

<sup>b</sup> School of food science, NanJing XiaoZhuang University, Nanjing, Jiangsu, China

### **\*Corresponding Author:**

Chongjiang Cao\*, College of Engineering, China Pharmaceutical University, Nanjing, Jiangsu, 211198: Tel +86 13770625999; E-mail: ccj33@163.com

Feng Zhou\*, School of food science, NanJing XiaoZhuang University, Nanjing, Jiangsu, E-mail: zfibcas@163.com

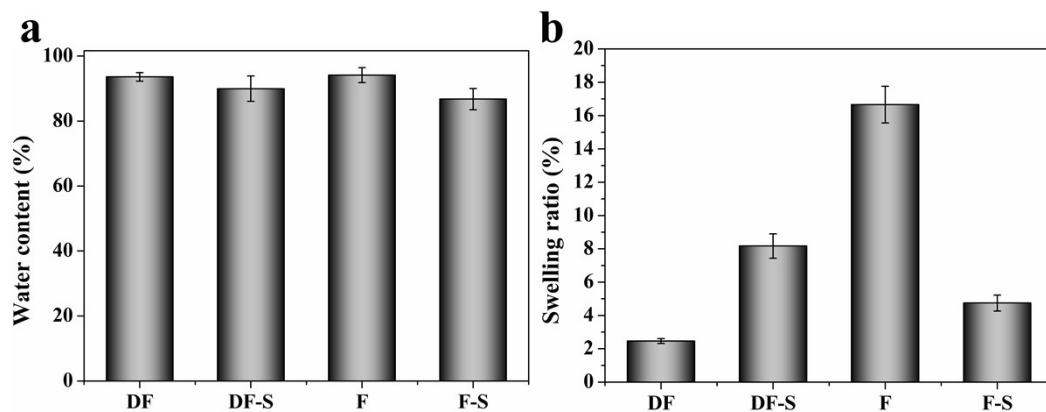

**Figure S1.** (a) Water content and (b) swelling ratio of DF, DF-S, F and F-S hydrogels;

Rheological properties of DF, DF-S, F and F-S hydrogels.

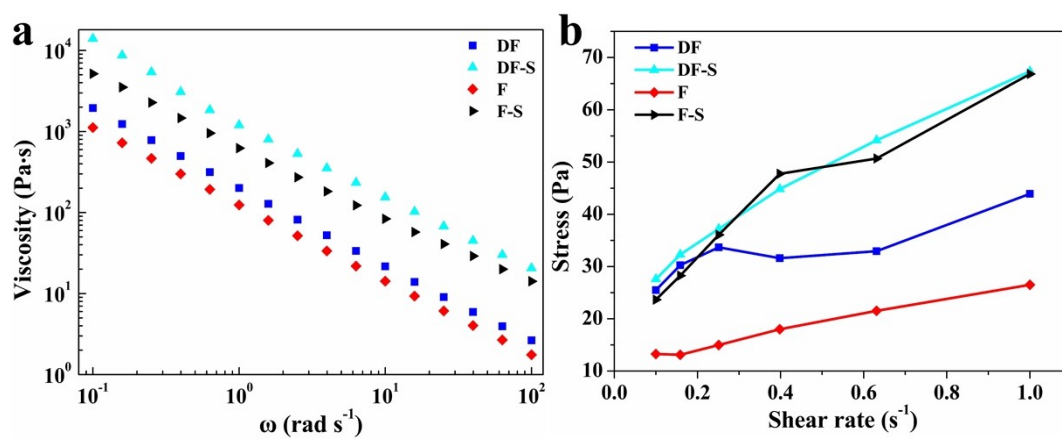

**Figure S2.** Rheological properties of DF, DF-S, F and F-S hydrogels. Frequency

dependence of (a) viscosity and shears rate dependence of (b) stress.

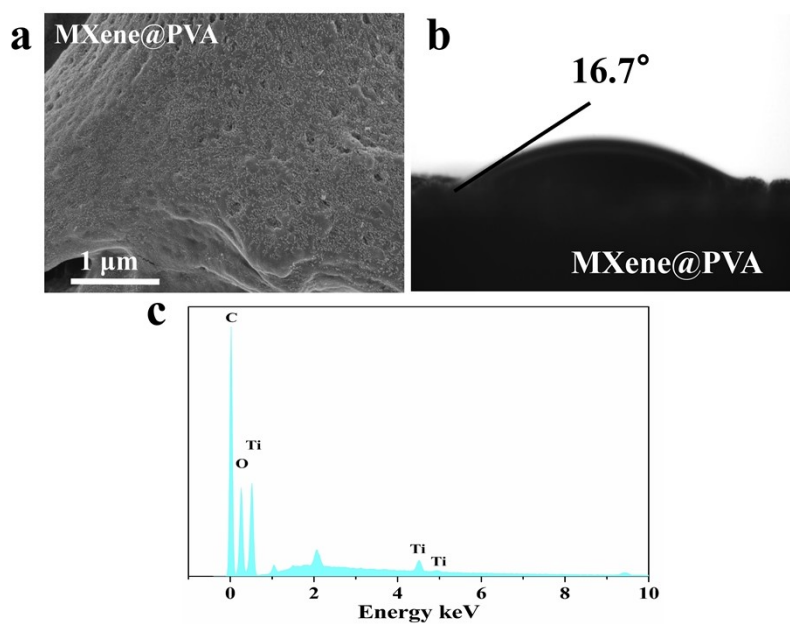

**Figure S3.** (a) SEM images of MXene@PVA (1 μm); (b) The contact angle measurement of MXene@PVA; (c) EDS spectrum of MXene@PVA hydrogel.

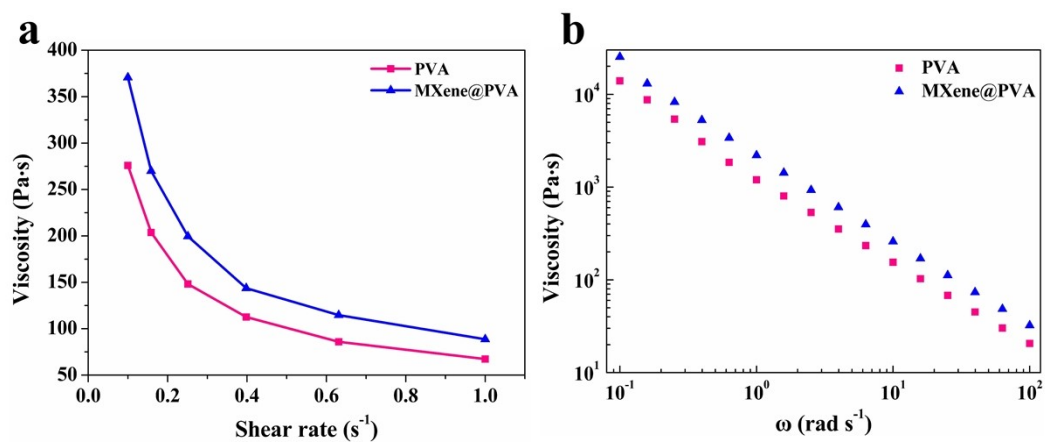

**Figure S4.** Rheological properties of PVA and MXene@PVA hydrogels. Shears rate dependence of (a) viscosity and frequency dependence of (b) viscosity.

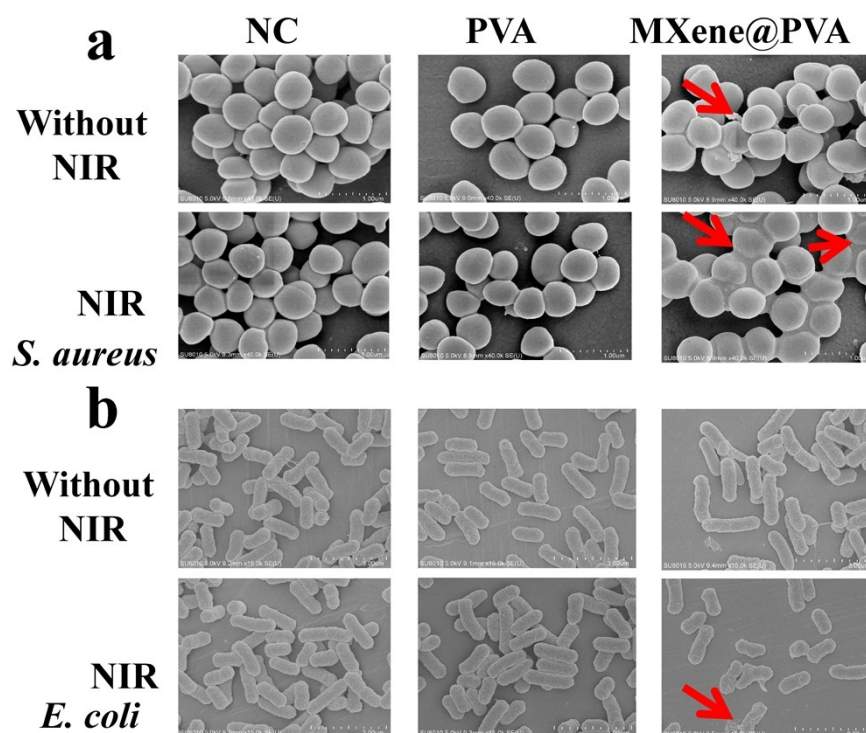

**Figure S5.** SEM images of *S. aureus* (a) and *E. coli* (b) cells with various treatments.

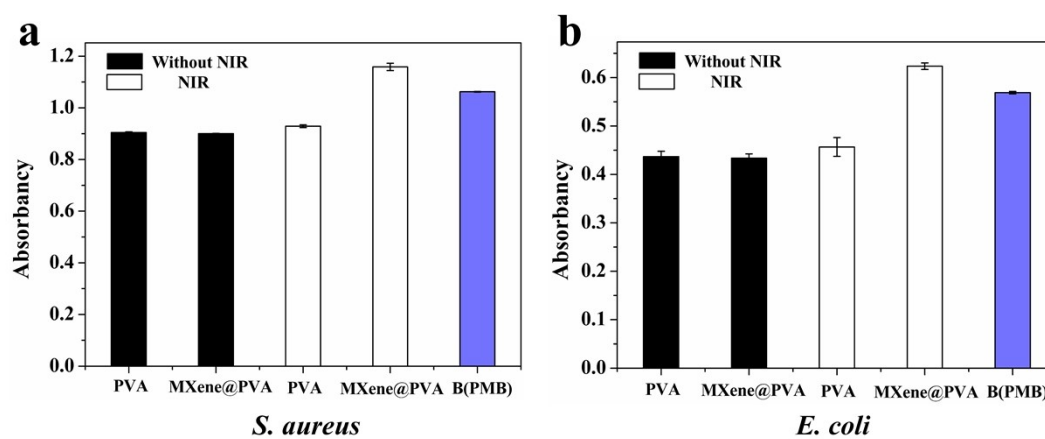

**Figure S6.** Bacterial membrane permeability assays of *S. aureus* (a) and *E. coli* (b) using

NPN fluorescence assay

**Table S1.** Proportion of elements in MXene@PVA hydrogel

| Element          | C     | O     | Ti   |
|------------------|-------|-------|------|
| weight ratio (%) | 39.08 | 57.81 | 3.03 |

.
